# Supplementary material
Source: HighWire-hosted journal article supplement (https://bmjopengastro.bmj.com/highwire/filestream/2187/field_highwire_adjunct_files/0/bmjgast-2021-000638supp001_data_supplement.pdf)
Supplement: bmjgast-2021-000638supp001_data_supplement.pdf [file bmjgast-2021-000638supp001_data_supplement.pdf]

| Site | ALT (Units/L)  | AST (Units/L)  | GGT (Units/L) |
|------|----------------|----------------|---------------|
| 1    | 50             | 50             | 70            |
| 2    | M: 50<br>F: 35 | M: 50<br>F: 35 | 70            |
| 3    | 40             | 40             | 70            |
| 4    | 40             | 40             | 70            |
| 5    | 40             | 40             | 70            |
| 6    | M: 30<br>F: 35 | M: 40<br>F: 40 | 70            |
| 7    | 60             | 60             | 70            |
| 8    | 40             | 40             | 70            |
| 9    | 40             | 40             | 70            |
| 10   | M: 40<br>F: 35 | M: 40<br>F: 30 | 70            |
| 11   | 50             | 40             | 70            |
| 12   | 40             | 40             | 70            |

Supplementary table 1: Upper limit of normal of Liver Enzymes
